# Supplementary material for: Magnetoelectric bistability of molecular ferroic solids
Source: Royal Society of Chemistry journal article supplement (doi:10.1039/c9tc02641j), 2019-01-01
Supplement: c9tc02641j1.pdf [file c9tc02641j1.pdf]

## Supporting information

# Magnetolectric Bistability of Molecular Ferroic Solids

*Ying-Shi Guan,<sup>†,‡</sup> Yong Hu,<sup>†,‡</sup>, Changning Li, and Shenqiang Ren<sup>†,\*</sup>*

<sup>†</sup>Department of Mechanical and Aerospace Engineering, Research and Education in Energy, Environment & Water (RENEW) Institute, University at Buffalo, The State University of New York, Buffalo, New York 14260, United States.

<sup>‡</sup>These authors contributed equally to this work.

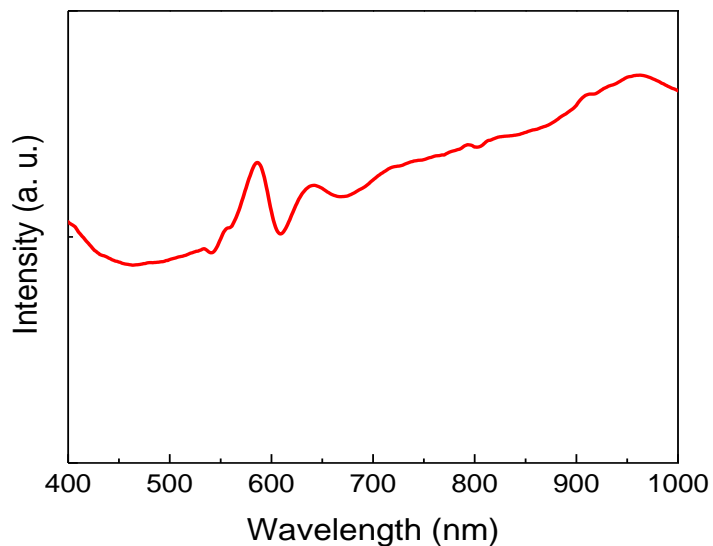

Figure S1. The absorption spectrum of KB sample.

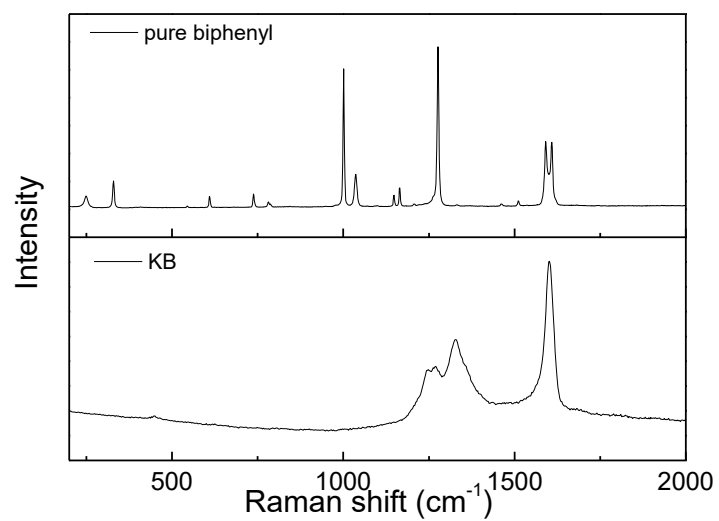

Figure S2. The Raman spectrum of pure biphenyl and KB samples.

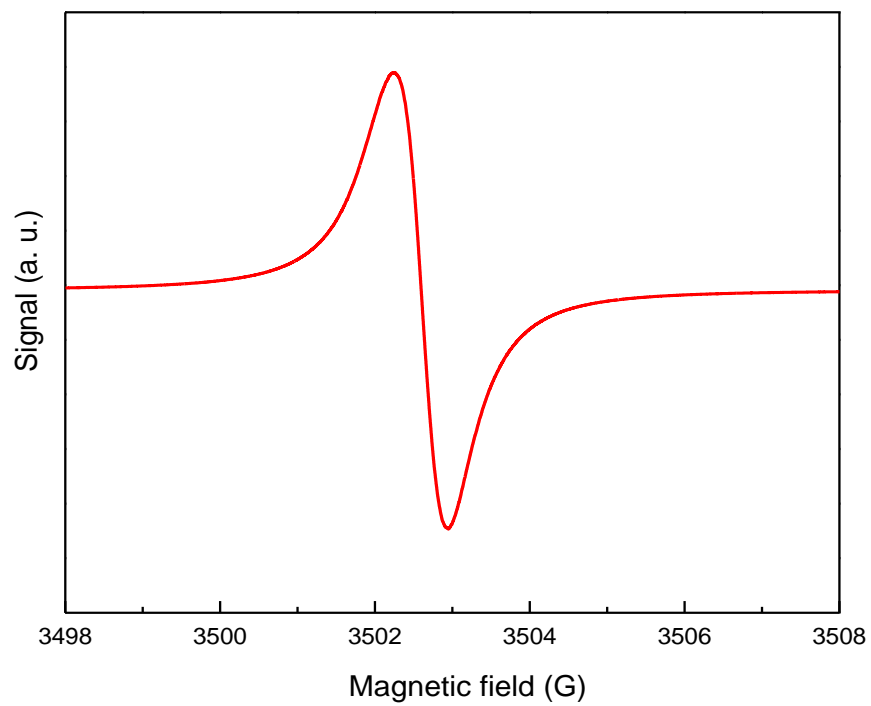

Figure S3. The EPR spectrum of KB sample at room temperature.

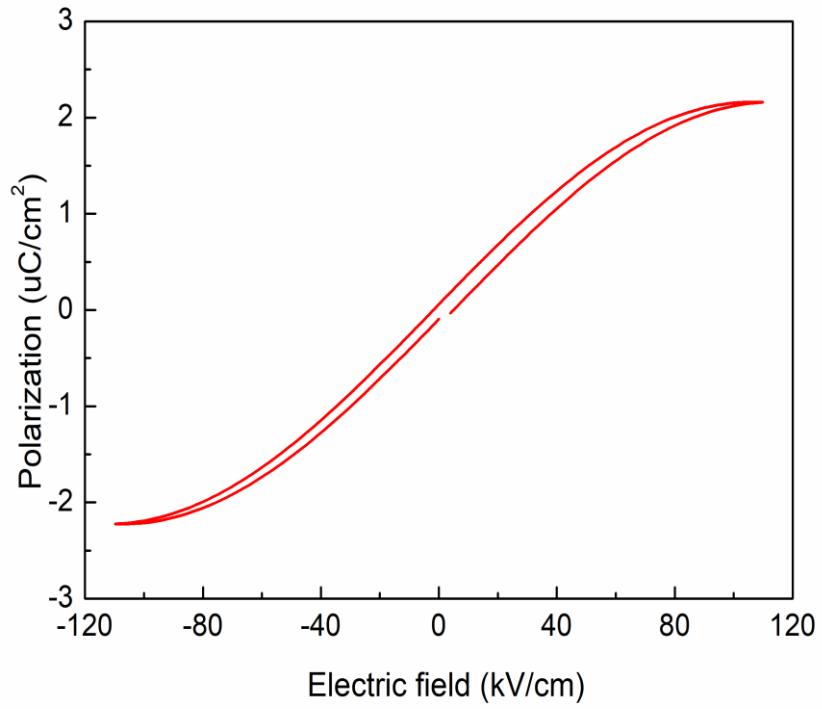

Figure S4. The P-E loop of PVDF-TrFE sample.

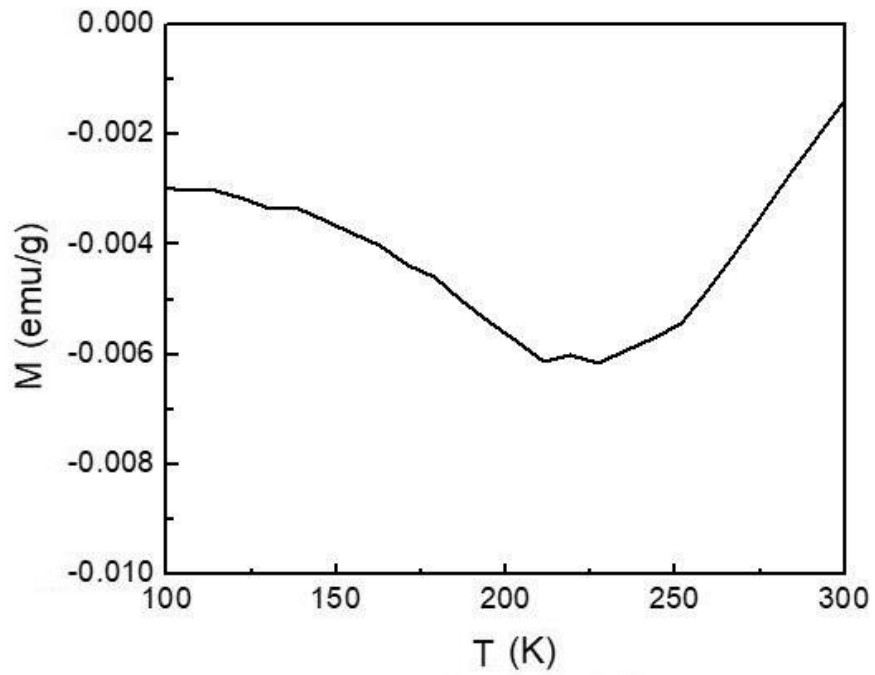

Figure S5. Temperature dependent magnetization of KB.

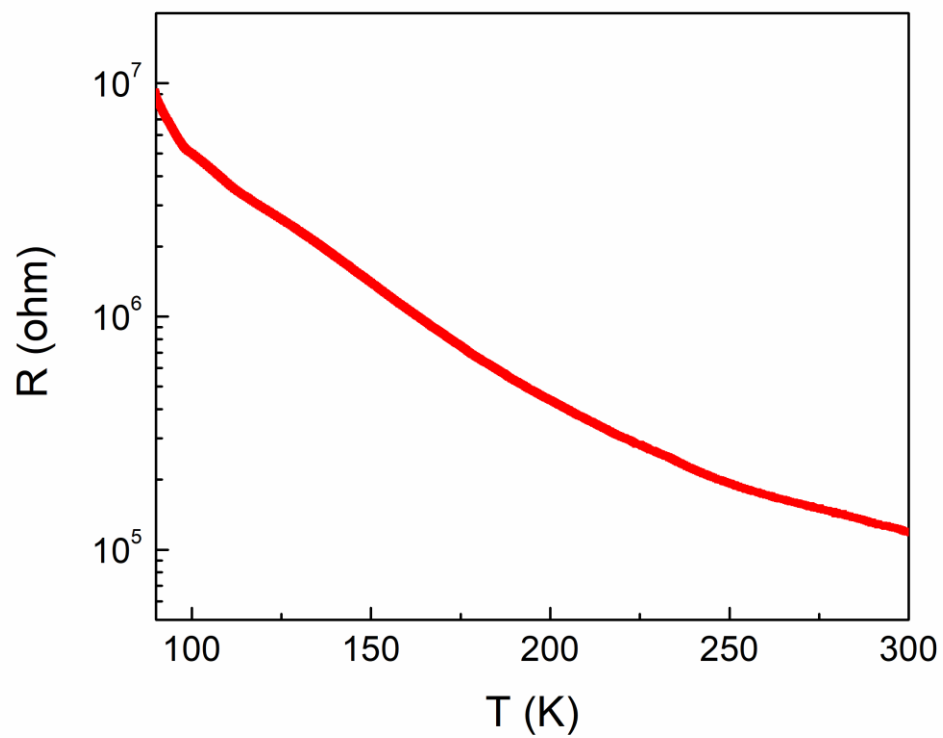

Figure S6. The temperature dependent resistivity of KB.

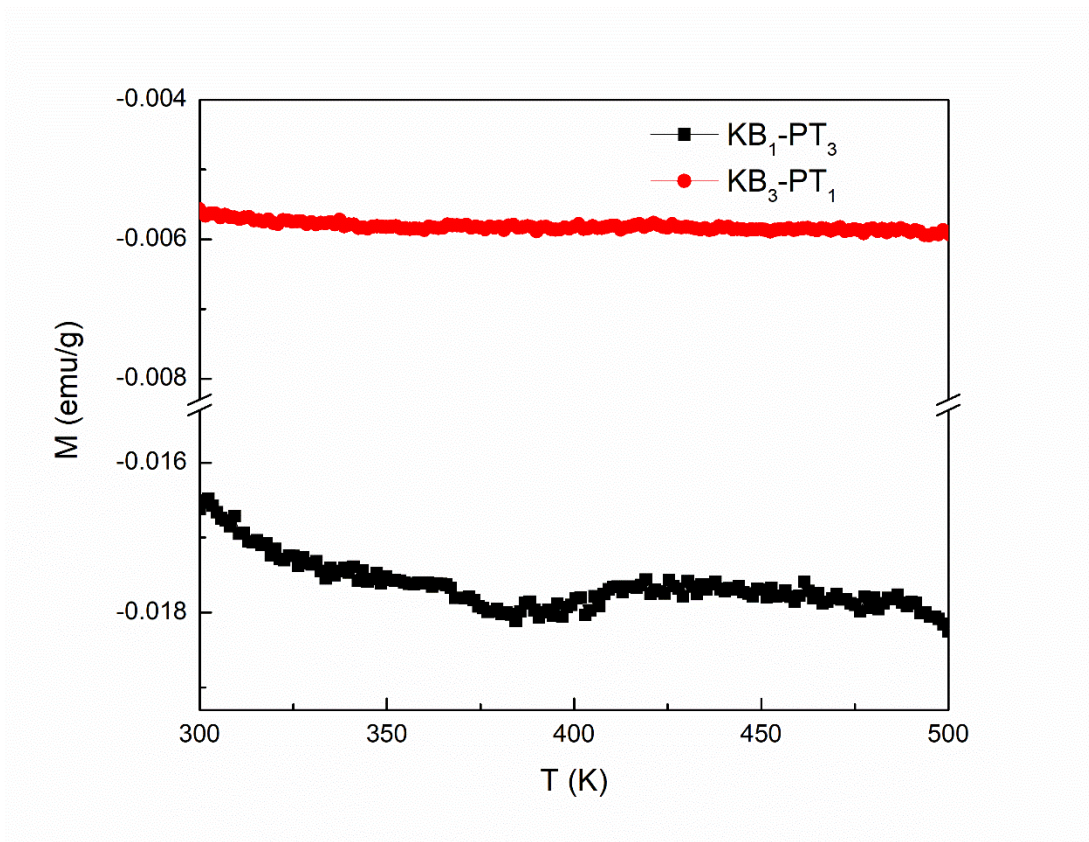

Figure S7. Temperature dependent magnetization of  $\text{KB}_1\text{-PT}_3$  and  $\text{KB}_3\text{-PT}_1$ .

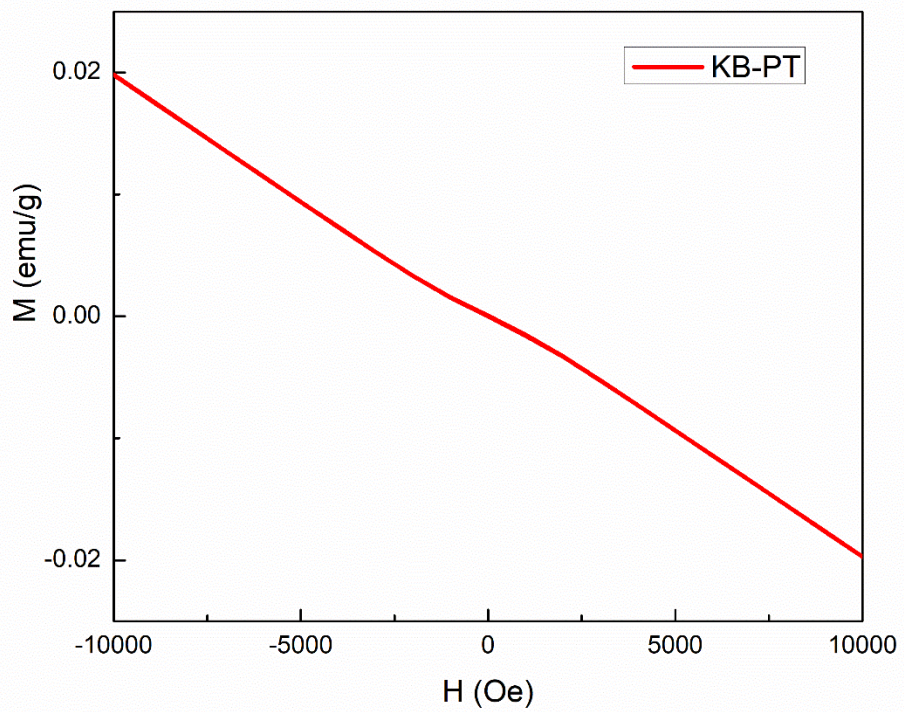

Figure S8. M-H loop of KB-PT composite at room temperature.
